# Supplementary material for: A toolbox of IgG subclass-switched recombinant monoclonal antibodies for enhanced multiplex immunolabeling of brain
Source: eLife journal article supplement (doi:10.7554/elife.43322), 2019-01-22
Supplement: supp [file elife-43322-supp-v1.zip]

Archive with 3 entries (3 files):
- elife_poa_e43322_Supplementary_file_1.docx
- elife_poa_e43322_Transparent_Reporting_File.pdf
- elife_poa_e43322_Supplementary_file_2.docx
